# Supplementary material for: Thermal Decomposition of [AH][M(HCOO)3] Perovskite-Like Formates
Source: MDPI journal article supplement (doi:10.3390/solids2020011), 2021-05-02
Supplement: s1 [file s1]

## Thermal decomposition of formate perovskites

*L. Claudia Gómez-Aguirre,<sup>a</sup> Jorge Otero-Canabal,<sup>b</sup> Manuel Sánchez-Andújar,<sup>ac</sup> María Antonia Señarís-Rodríguez,<sup>ac</sup> Socorro Castro-García,<sup>ac</sup> Breogán Pato-Doldán.<sup>a</sup>*

<sup>a</sup>Department of Chemistry, Faculty of Sciences, University of A Coruña, 15071 A Coruña, Spain

<sup>b</sup>Molecular Spectroscopy Unit, SAL, University of A Coruña, 15071 A Coruña, Spain.

<sup>c</sup>Centro de Investigacións Científicas Avanzadas (CICA), Universidade da Coruña, 15071 A Coruña, Spain

**Table S 1.** Quality of reagents used in the synthesis of [AH][M(HCOO)<sub>3</sub>] materials.

| Starting reagent                                      | Purity             |
|-------------------------------------------------------|--------------------|
| <b>Metallic salts</b>                                 |                    |
| MgCl <sub>2</sub>                                     | Sigma-Aldrich ≥98% |
| MnCl <sub>2</sub> ·4H <sub>2</sub> O                  | Sigma-Aldrich ≥98% |
| CoCl <sub>2</sub> ·6H <sub>2</sub> O                  | Sigma-Aldrich 98%  |
| NiCl <sub>2</sub>                                     | Sigma-Aldrich 98%  |
| Cu(ClO <sub>4</sub> ) <sub>2</sub>                    | Sigma-Aldrich 98%  |
| ZnCl <sub>2</sub>                                     | Fluka ≥98%         |
| Cd(ClO <sub>4</sub> ) <sub>2</sub> ·xH <sub>2</sub> O | Sigma-Aldrich 98%  |
| <b>Organic reagents</b>                               |                    |
| NaHCOO                                                | Sigma-Aldrich ≥99% |
| NH <sub>4</sub> HCOO                                  | Panreac 99.995%    |
| HCOOH                                                 | Fluka 98%          |
| CH <sub>3</sub> NH <sub>3</sub> Cl                    | Sigma-Aldrich ≥99% |
| (CH <sub>3</sub> ) <sub>2</sub> NH                    | Sigma-Aldrich ≥99% |
| HCONHCH <sub>3</sub>                                  | Sigma-Aldrich 99%  |

XRPD:  $[\text{CH}_3\text{NH}_3][\text{Mg}(\text{HCOO})_3]$

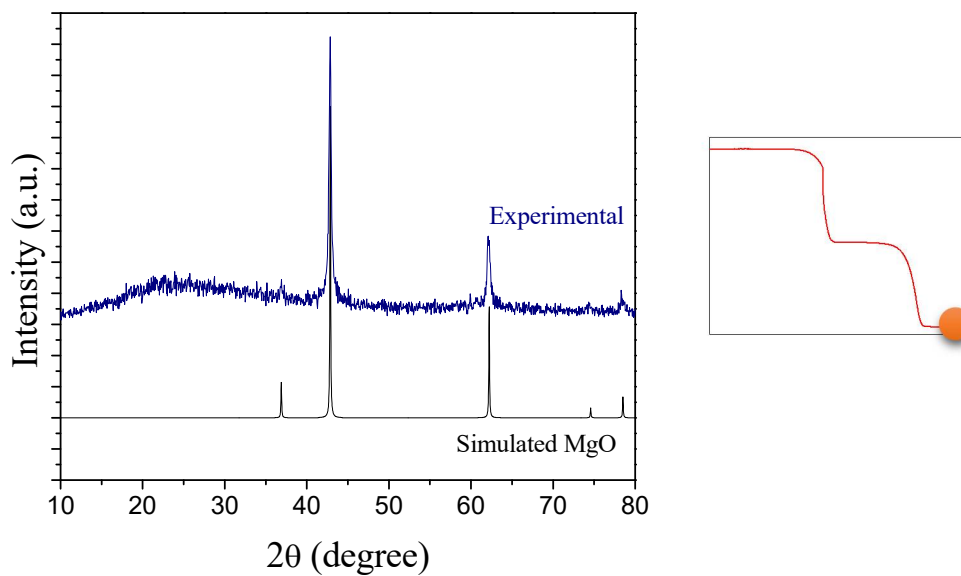

**Figure S 1.** XRPD pattern obtained after heating the  $[\text{CH}_3\text{NH}_3][\text{Mg}(\text{HCOO})_3]$  sample to  $600^\circ\text{C}$ . Comparison against the trace reported in the literature for MgO [1].

XRPD:  $[\text{CH}_3\text{NH}_3][\text{Mn}(\text{HCOO})_3]$

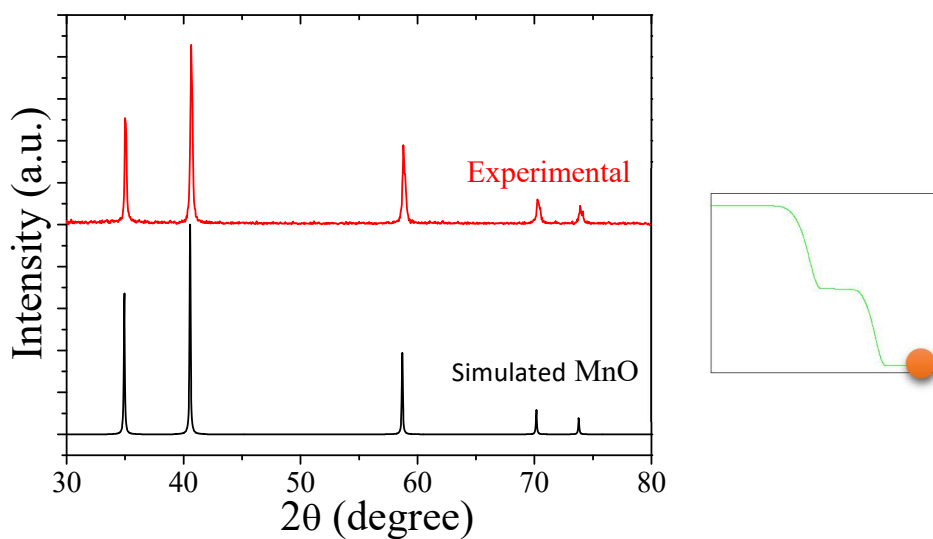

**Figure S 2.** XRPD pattern obtained after heating the  $[\text{CH}_3\text{NH}_3][\text{Mn}(\text{HCOO})_3]$  sample to  $600^\circ\text{C}$ . Comparison against the trace reported in the literature for MnO [1].

**XRPD:  $[\text{CH}_3\text{NH}_3][\text{Zn}(\text{HCOO})_3]$**

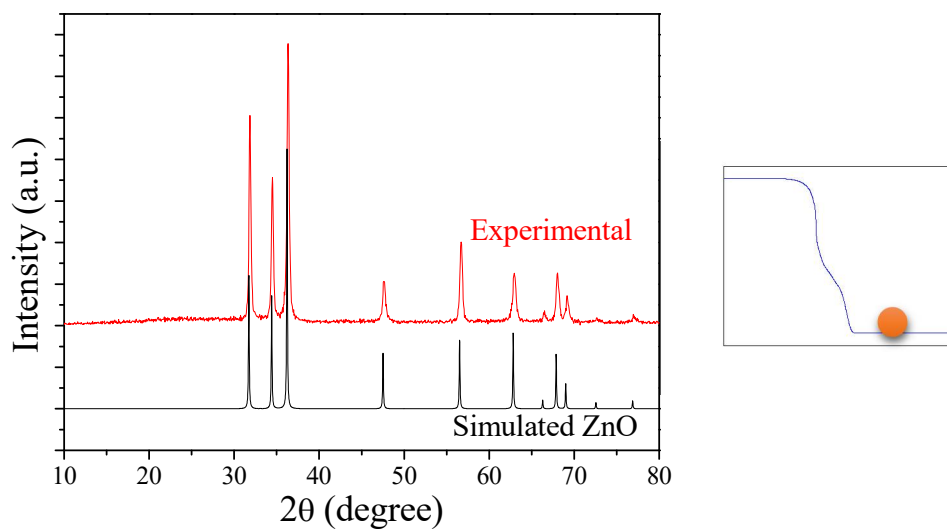

**Figure S 3.** XRPD pattern obtained after heating the  $[\text{CH}_3\text{NH}_3][\text{Zn}(\text{HCOO})_3]$  sample to 600°C. Comparison against the trace reported in the literature for ZnO [2].

**XRPD:  $[\text{CH}_3\text{NH}_3][\text{Ni}(\text{HCOO})_3]$**

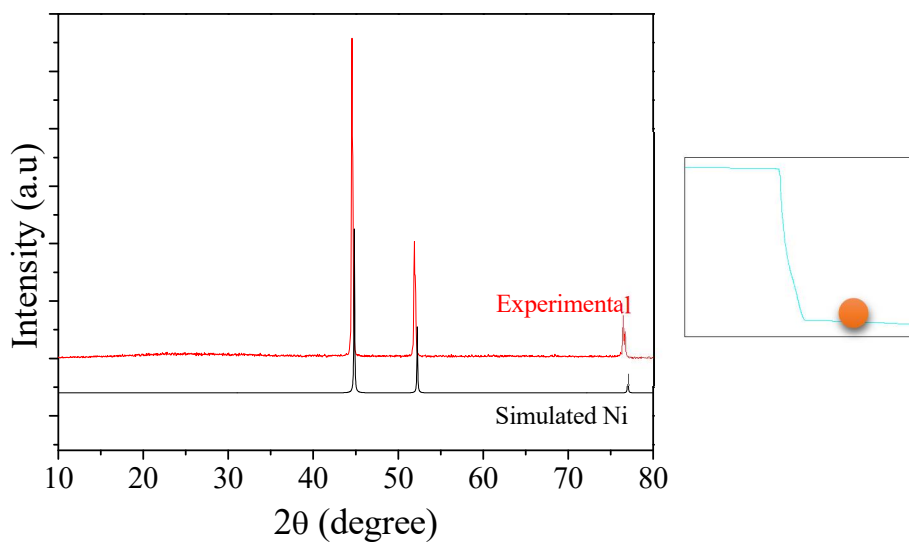

**Figure S 4.** XRPD pattern obtained after heating the  $[\text{CH}_3\text{NH}_3][\text{Ni}(\text{HCOO})_3]$  sample to 600°C. Comparison against the trace reported in the literature for Ni [3].

### XRPD: $[\text{CH}_3\text{NH}_3][\text{Cu}(\text{HCOO})_3]$

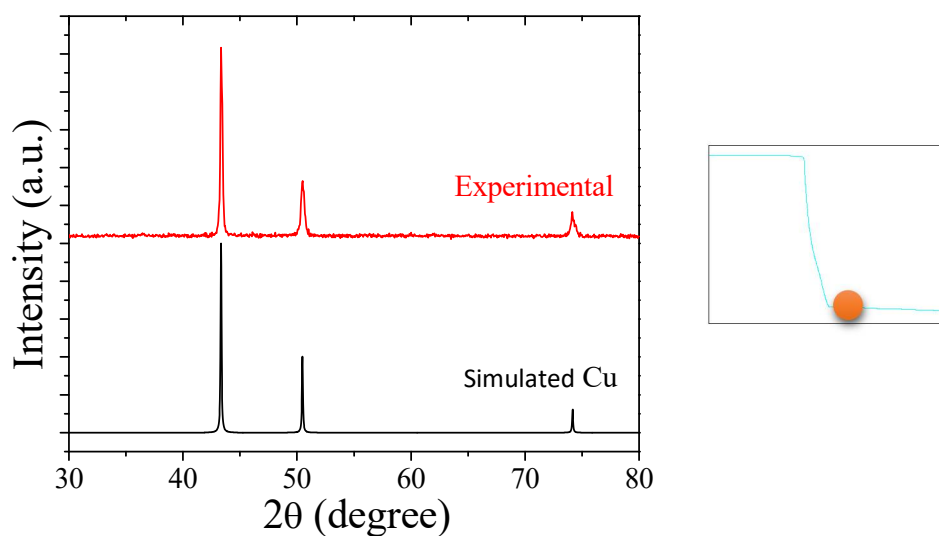

**Figure S 5.** XRPD pattern obtained after heating the  $[\text{CH}_3\text{NH}_3][\text{Cu}(\text{HCOO})_3]$  sample to 600 °C. Comparison against the trace reported in the literature for Cu [4].

### XRPD: $[\text{CH}_3\text{NH}_3][\text{Co}(\text{HCOO})_3]$

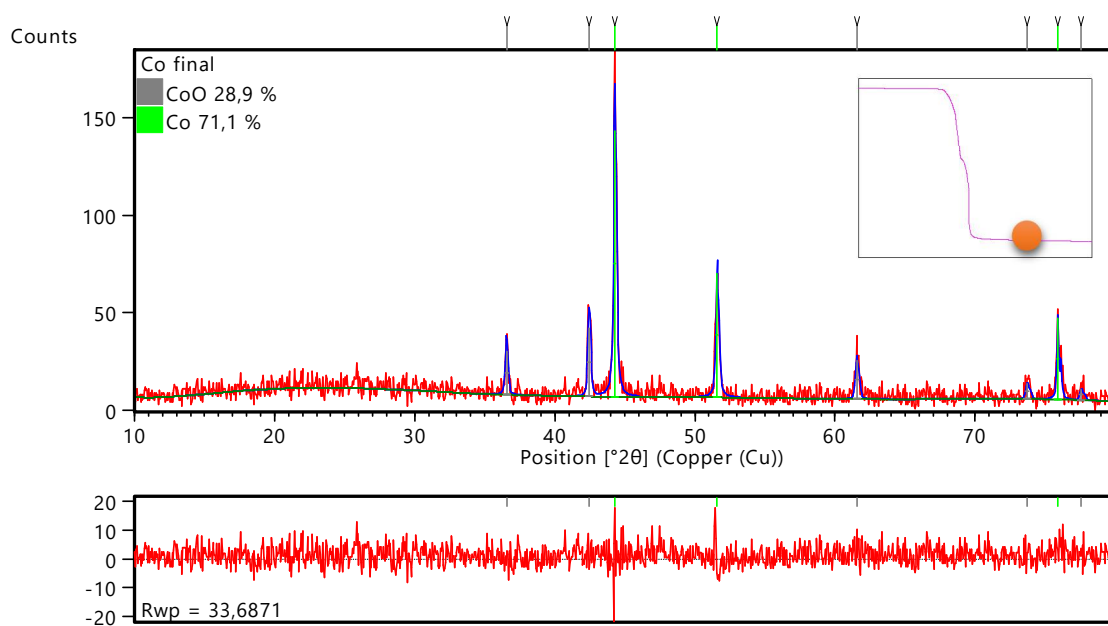

**Figure S 6.** Rietveld refinement of the XRPD pattern obtained after heating the  $[\text{CH}_3\text{NH}_3][\text{Co}(\text{HCOO})_3]$  sample to 600°C. Literature source for CoO [1] and Co [5].

### XRPD: $[\text{CH}_3\text{NH}_3][\text{Mg}(\text{HCOO})_3]$

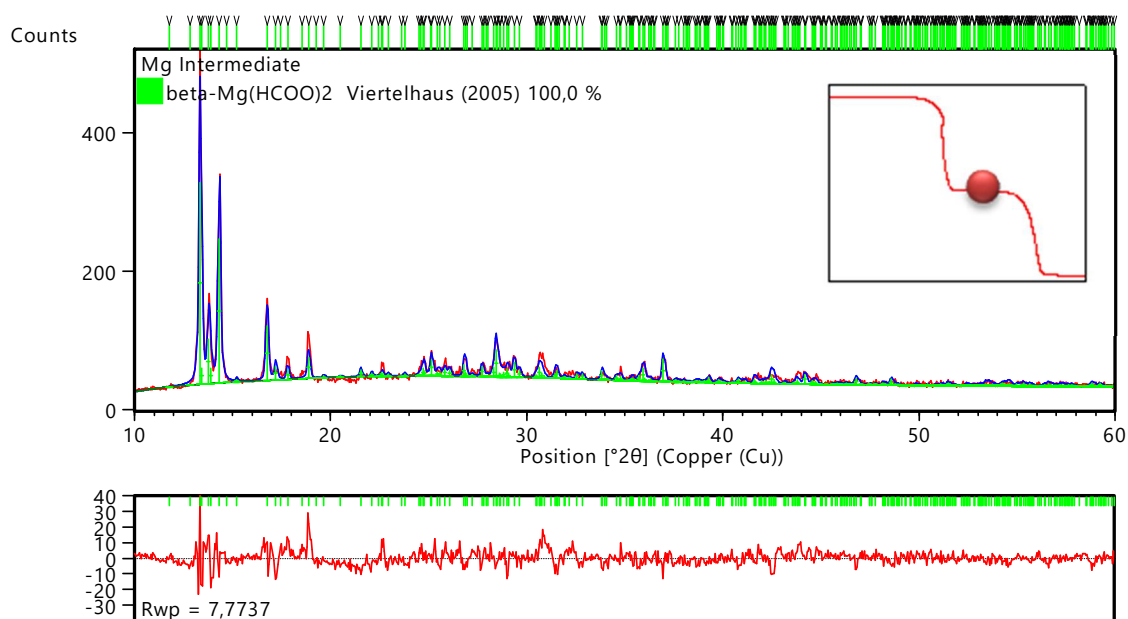

**Figure S 7.** Rietveld refinement of the XRPD pattern obtained after heating the  $[\text{CH}_3\text{NH}_3][\text{Mg}(\text{HCOO})_3]$  sample to 350°C. Literature source for  $\beta\text{-Mg}(\text{HCOO})_2$  [6].

### XRPD: $[\text{CH}_3\text{NH}_3][\text{Mn}(\text{HCOO})_3]$

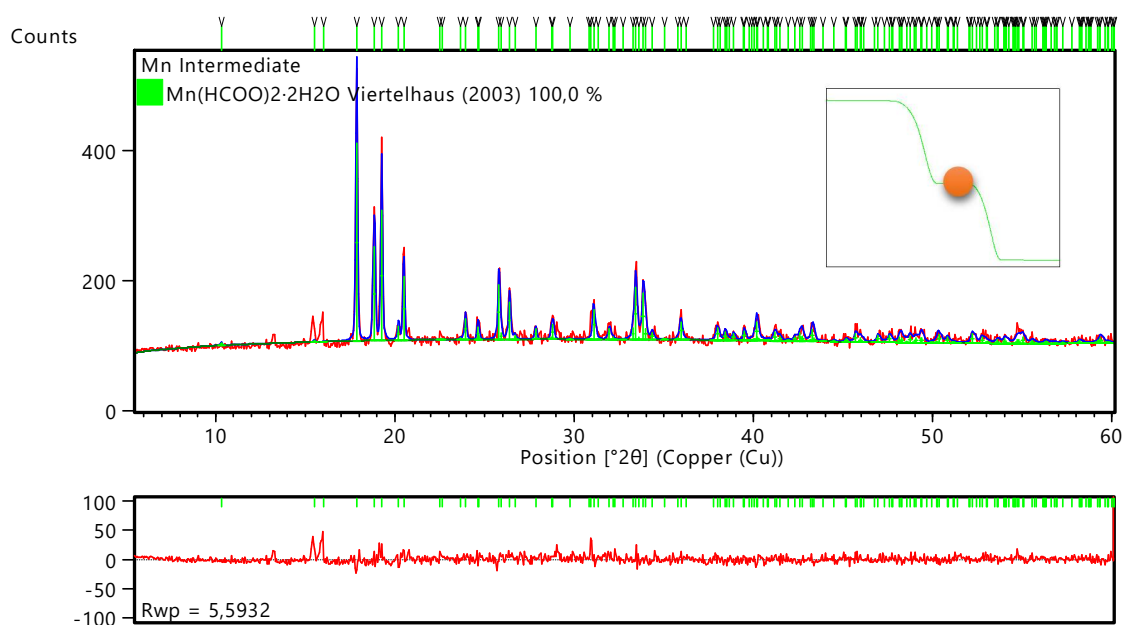

**Figure S 8.** Rietveld refinement of the XRPD pattern obtained after heating the  $[\text{CH}_3\text{NH}_3][\text{Mn}(\text{HCOO})_3]$  sample to 300 °C. Literature source for  $\text{Mn}(\text{HCOO})_2 \cdot 2\text{H}_2\text{O}$  [7].

IR of the gases released by TGA for  $[\text{CH}_3\text{NH}_3][\text{M}(\text{HCOO})_3]$  (M = Mg, Mn, Zn, Co, Ni, and Cu)

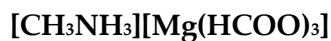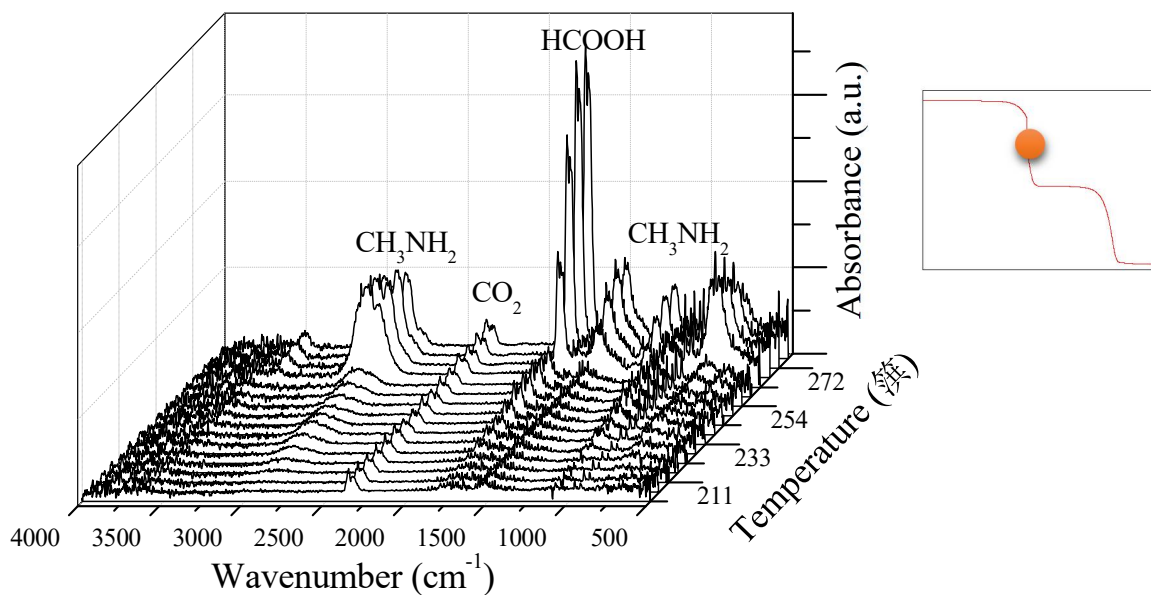

Figure S 9. IR spectra of released gases from  $[\text{CH}_3\text{NH}_3][\text{Mg}(\text{HCOO})_3]$  between 200-280  $^{\circ}\text{C}$ .

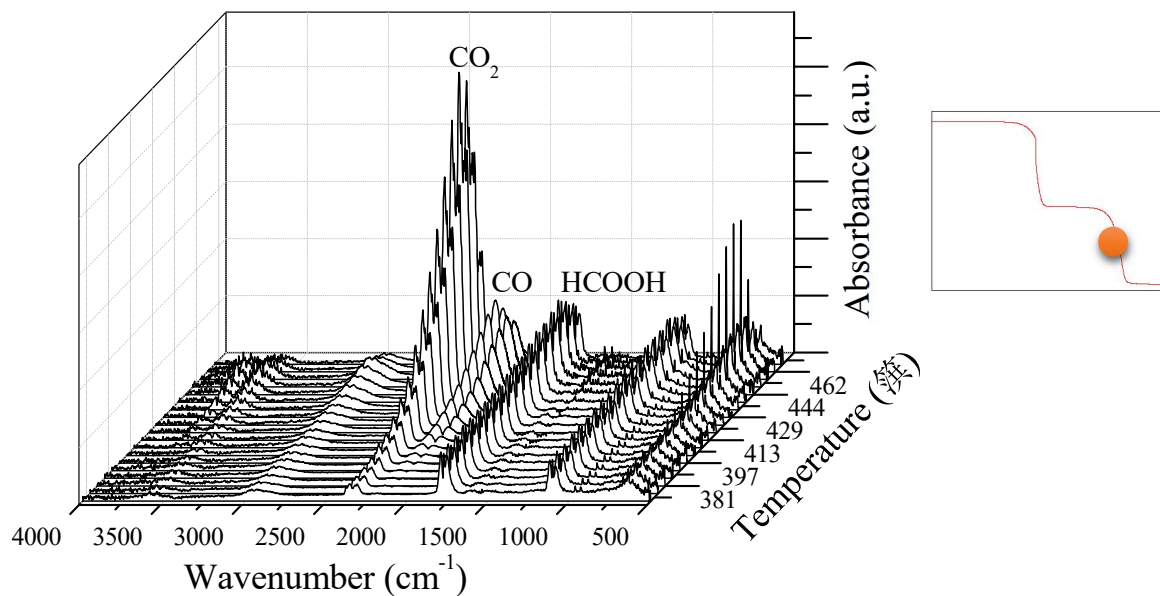

Figure S 10. IR spectra of released gases from  $[\text{CH}_3\text{NH}_3][\text{Mg}(\text{HCOO})_3]$  between 370-470  $^{\circ}\text{C}$ .

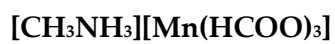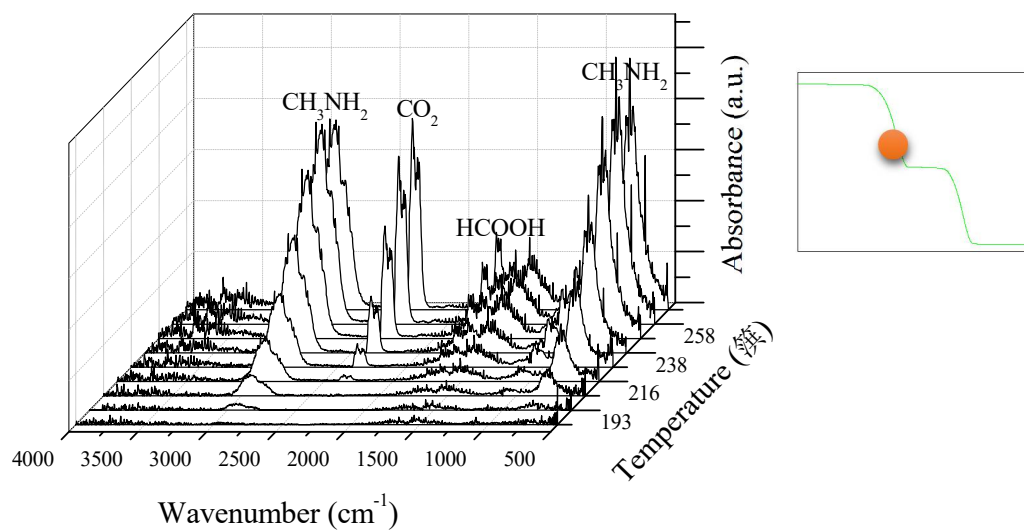

**Figure S 11.** IR spectra of released gases from  $[\text{CH}_3\text{NH}_3][\text{Mn}(\text{HCOO})_3]$  between 180-280  $^{\circ}\text{C}$ .

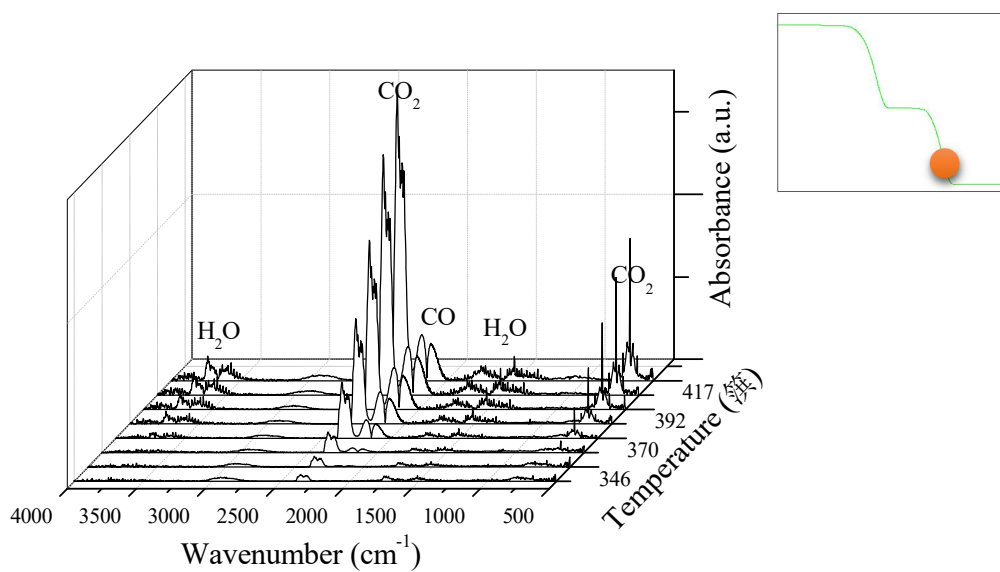

**Figure S 12.** IR spectra of released gases from  $[\text{CH}_3\text{NH}_3][\text{Mn}(\text{HCOO})_3]$  between 340-423  $^{\circ}\text{C}$ .

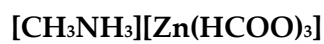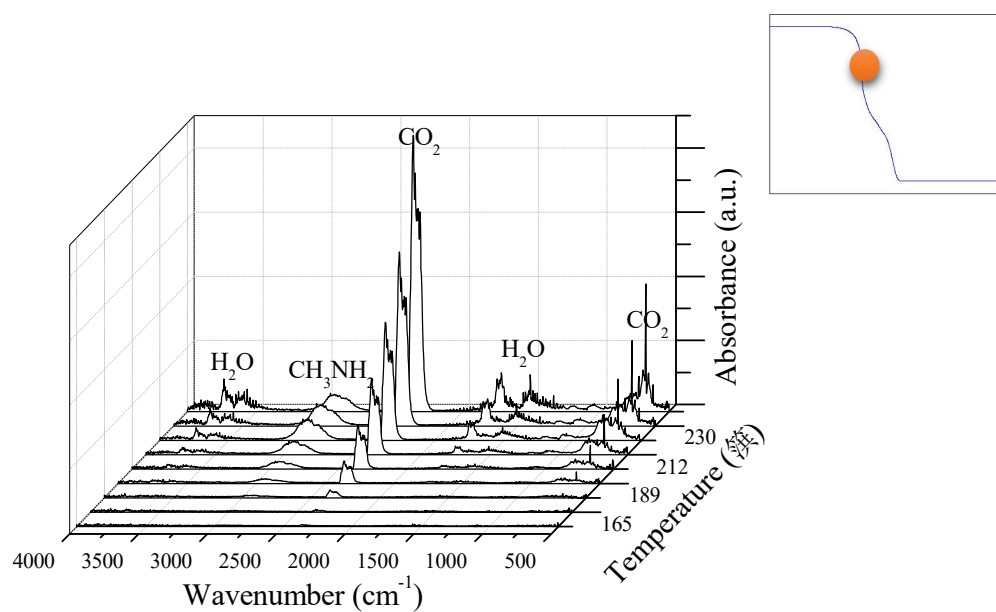

**Figure S 13.** IR spectra of released gases from  $[\text{CH}_3\text{NH}_3][\text{Zn}(\text{HCOO})_3]$  between 160-240  $^{\circ}\text{C}$ .

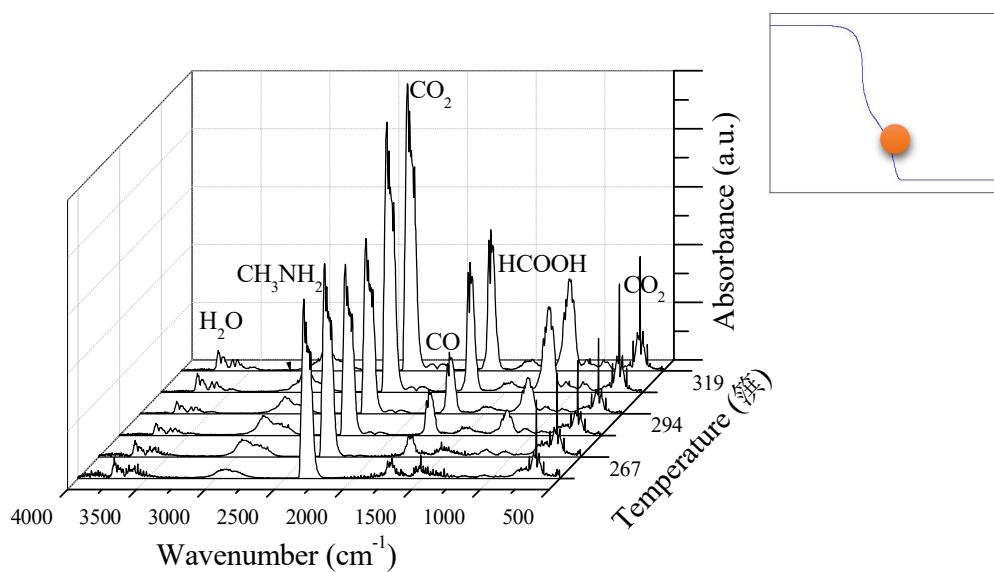

**Figure S 14.** IR spectra of released gases from  $[\text{CH}_3\text{NH}_3][\text{Zn}(\text{HCOO})_3]$  between 240-320  $^{\circ}\text{C}$ .



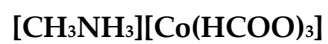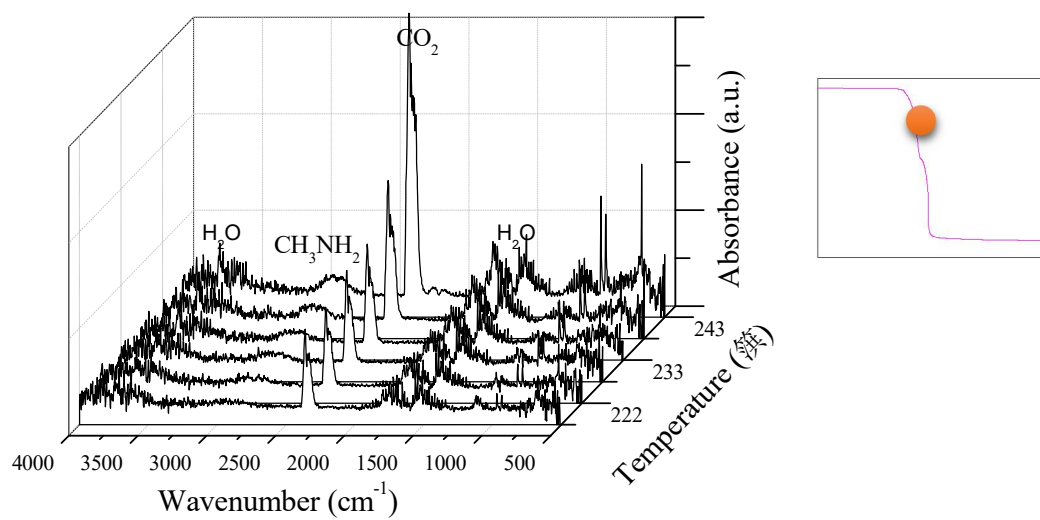

**Figure S 15.** IR spectra of released gases from  $[\text{CH}_3\text{NH}_3][\text{Co}(\text{HCOO})_3]$  between 215-254 °C.

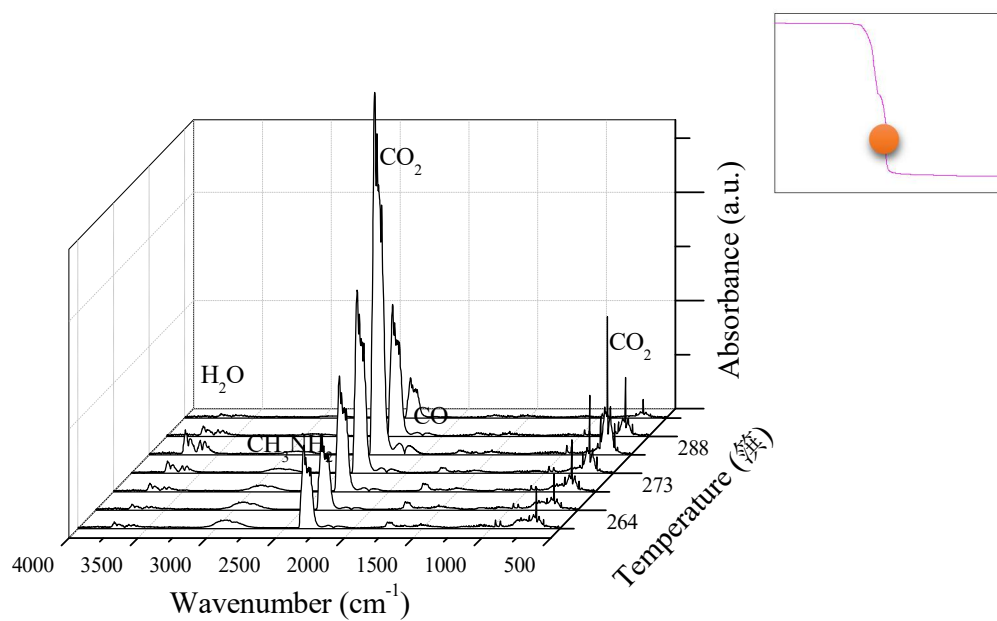

**Figure S 16.** IR spectra of released gases from  $[\text{CH}_3\text{NH}_3][\text{Co}(\text{HCOO})_3]$  between 254-290 °C.

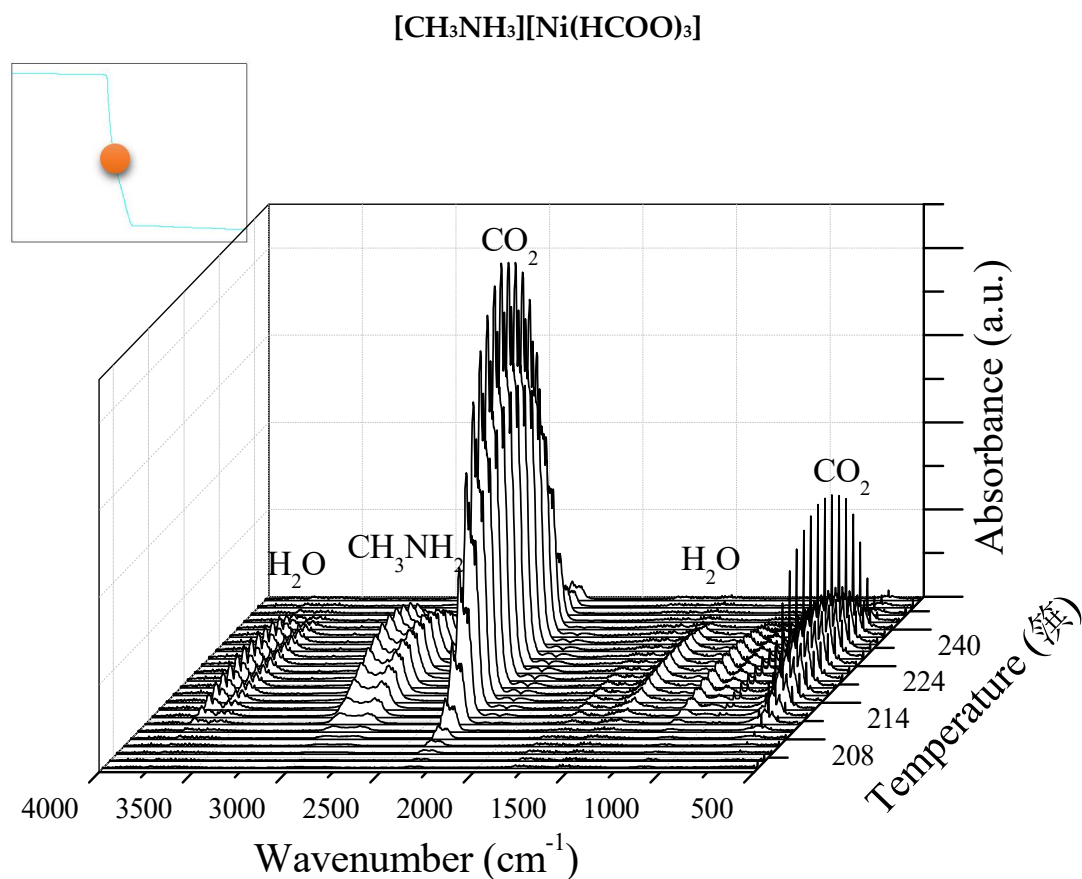

**Figure S 17.** IR spectra of released gases from  $[\text{CH}_3\text{NH}_3][\text{Ni}(\text{HCOO})_3]$  between 200-280  $^{\circ}\text{C}$ , recorded at 2  $\text{K}/\text{min}^1$

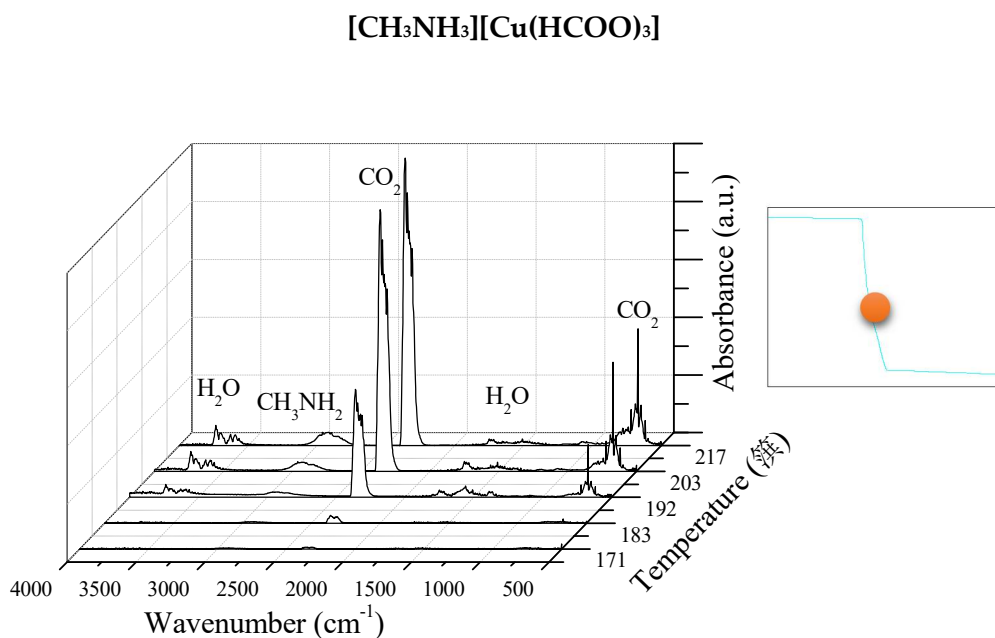

**Figure S 18.** IR spectra of released gases from  $[\text{CH}_3\text{NH}_3][\text{Cu}(\text{HCOO})_3]$  between 170-220  $^{\circ}\text{C}$ .

<sup>1</sup>  $[\text{CH}_3\text{NH}_3][\text{Ni}(\text{HCOO})_3]$  was heated at two different rates. At 5  $\text{K}/\text{min}$  (Figure 2b-iii), as the rest of the formates, and at 2  $\text{K}/\text{min}$  (Figure S17).



[AH][Cd(HCOO)<sub>3</sub>] where [AH]<sup>+</sup>= NH<sub>4</sub><sup>+</sup>, CH<sub>3</sub>NH<sub>3</sub><sup>+</sup>, (CH<sub>3</sub>)<sub>2</sub>NH<sub>2</sub><sup>+</sup>

**Table S2.** Summary of the thermal decomposition of [AH][Cd(HCOO)<sub>3</sub>] compounds.

| [AH] <sup>+</sup>                                            | Step n° | Decomposition<br>range (°C) | Weight loss |                | Decomposition<br>product  |
|--------------------------------------------------------------|---------|-----------------------------|-------------|----------------|---------------------------|
|                                                              |         |                             | Found (%)   | Calculated (%) |                           |
| NH <sub>4</sub> <sup>+</sup>                                 | 1       | 100-166                     | 23.4        | 23.4           | Cd(HCOO) <sub>2</sub>     |
|                                                              | 2       | 210-305                     | 16.6        | 28.9           | Cd(CO <sub>3</sub> ) + Cd |
|                                                              | 3       | 305-350                     | 4.9         | 3.4            | CdO + Cd                  |
|                                                              | 4       | 350-510                     | 29.6        | 27.7           | CdO                       |
| CH <sub>3</sub> NH <sub>3</sub> <sup>+</sup>                 | 1       | 130-215                     | 27.59       | 27.22          | Cd(HCOO) <sub>2</sub>     |
|                                                              | 2       | 230-304                     | 28.56       | 28.50          | Cd(CO <sub>3</sub> ) + Cd |
|                                                              | 3       | 304-350                     | 2.78        | 2.68           | CdO + Cd                  |
|                                                              | 4       | 420-527                     | 29.44       | 32.57          | CdO                       |
| (CH <sub>3</sub> ) <sub>2</sub> NH <sub>2</sub> <sup>+</sup> | 1       | 100-180                     | 30.16       | 31.04          | Cd(HCOO) <sub>2</sub>     |
|                                                              | 2       | 180-296                     | 25.89       | 24.54          | Cd(CO <sub>3</sub> ) + Cd |
|                                                              | 3       | 296-329                     | 3.1         | 4.5            | CdO + Cd                  |
|                                                              | 4       | 329-470                     | 22.08       | 26.80          | CdO                       |

**XRPD:  $[\text{CH}_3\text{NH}_3][\text{Cd}(\text{HCOO})_3]$**

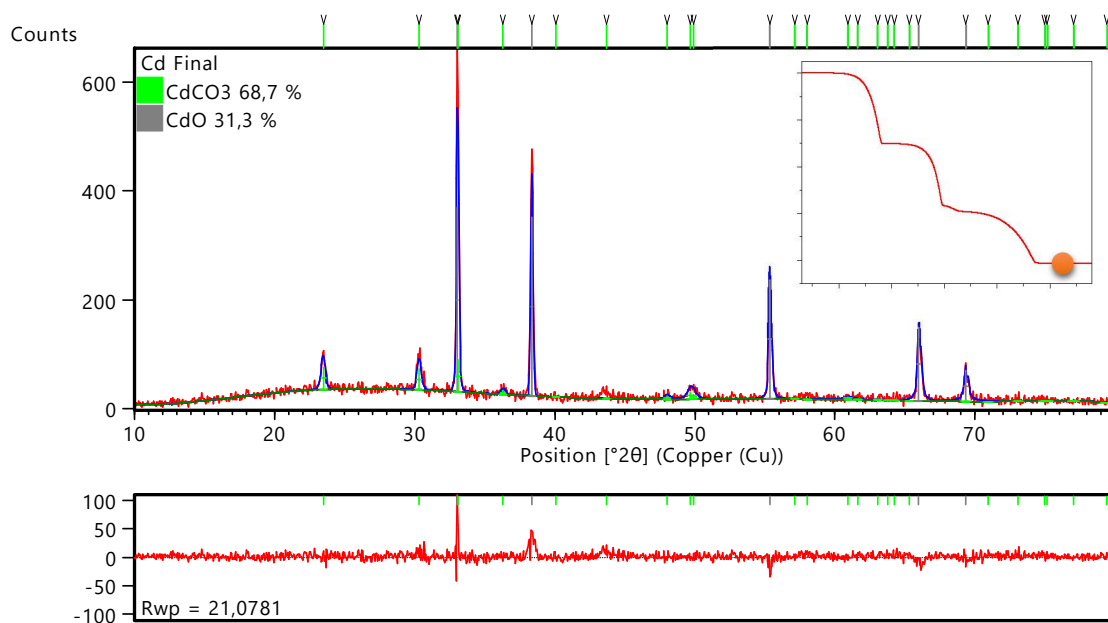

**Figure S 19.** Rietveld refinement of the XRPD pattern obtained after heating the  $[\text{CH}_3\text{NH}_3][\text{Cd}(\text{HCOO})_3]$  sample to  $600^\circ\text{C}$ . Literature source for  $\text{CdCO}_3$  [8] and  $\text{CdO}$  [9].

# IR of TGA gases for $[\text{AH}][\text{Cd}(\text{HCOO})_3]$

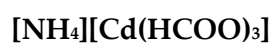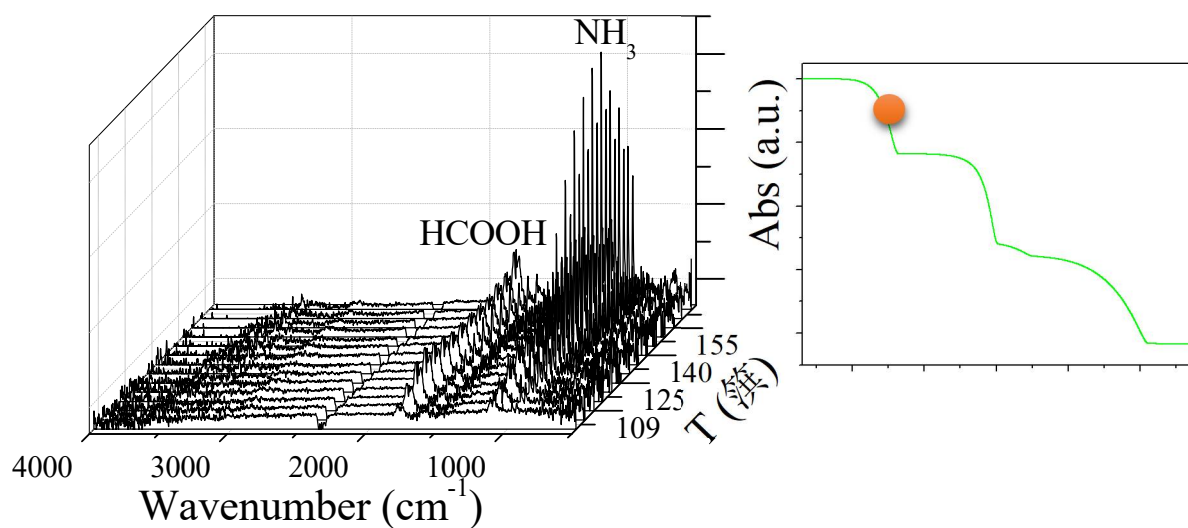

Figure S 20. IR spectra of released gases from  $[\text{NH}_4][\text{Cd}(\text{HCOO})_3]$  between 100–166 °C.

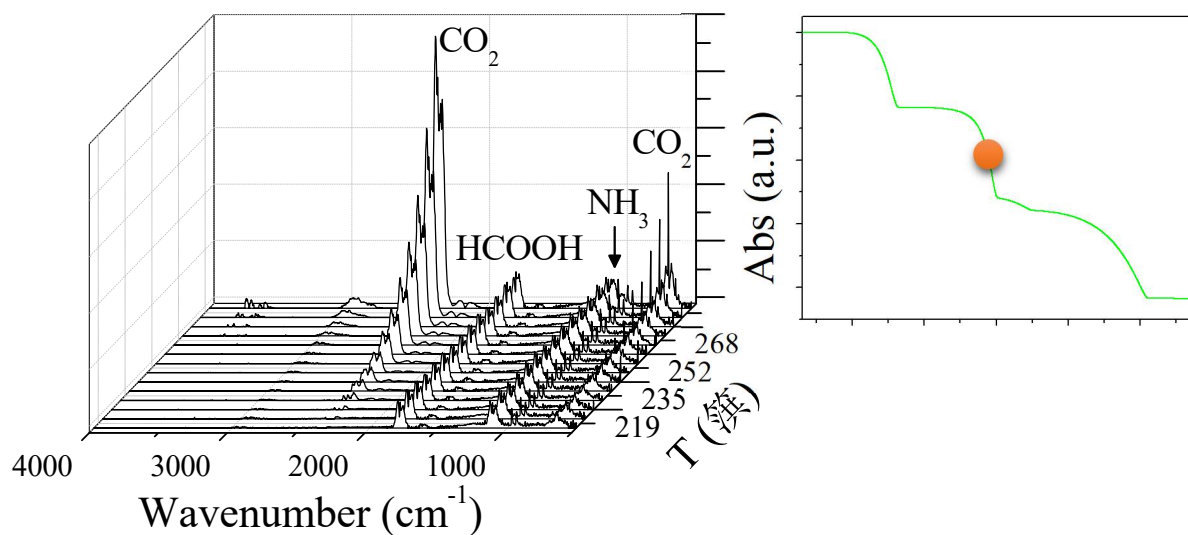

Figure S 21. IR spectra of released gases from  $[\text{NH}_4][\text{Cd}(\text{HCOO})_3]$  between 210–290 °C.

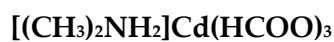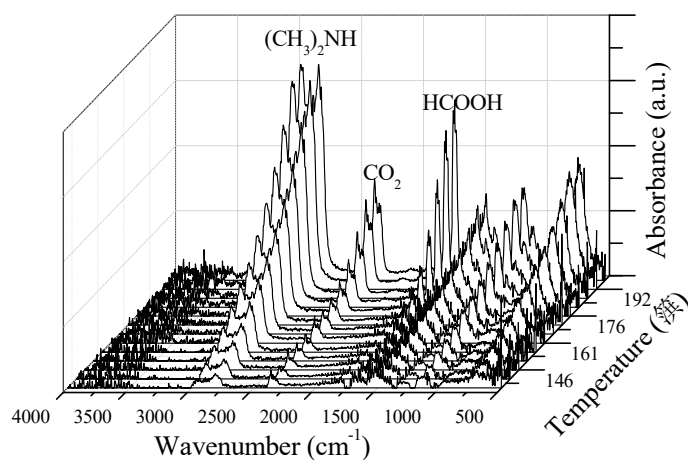

**Figure S 22.** IR spectra of released gases from  $[(\text{CH}_3)_2\text{NH}_2]\text{Cd}(\text{HCOO})_3$  between 120-200 °C.

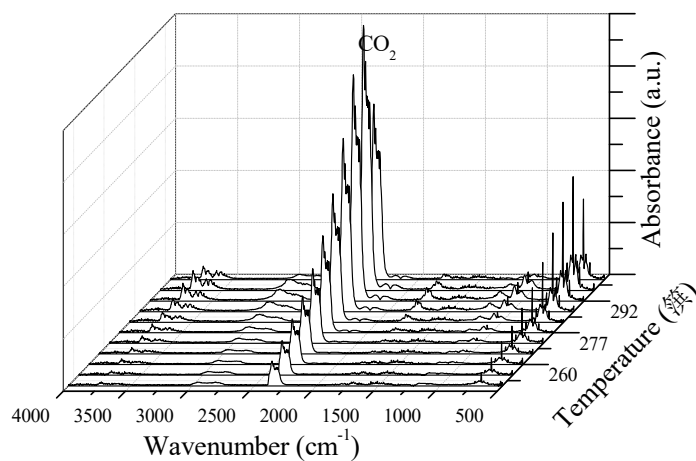

**Figure S 23.** IR spectra of released gases from  $[(\text{CH}_3)_2\text{NH}_2]\text{Cd}(\text{HCOO})_3$  between 250-296 °C.

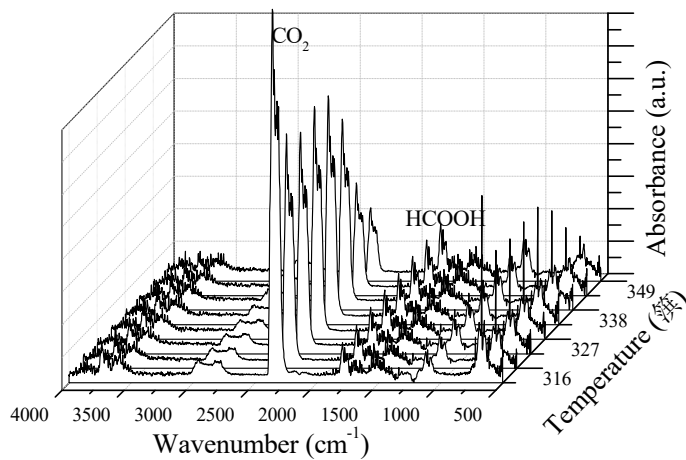

**Figure S 24.** IR spectra of released gases from  $[(\text{CH}_3)_2\text{NH}_2]\text{Cd}(\text{HCOO})_3$  between 306-352 °C.

# XRPD: $[\text{NH}_4][\text{Cd}(\text{HCOO})_3]$

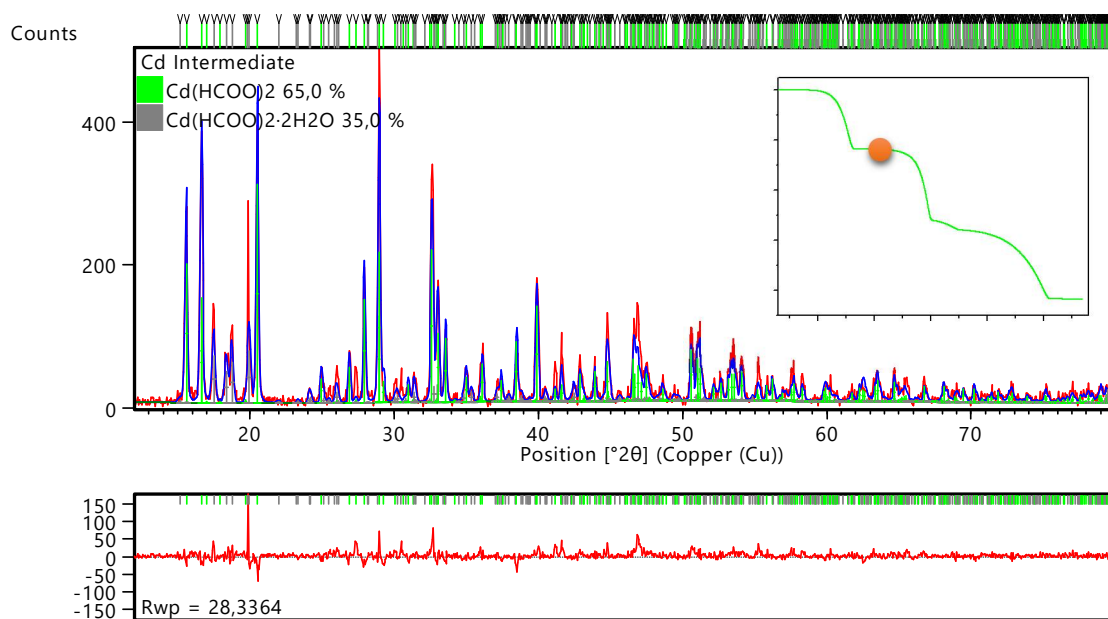

**Figure S 25.** Rietveld refinement of the XRPD pattern obtained after heating the  $[\text{NH}_4][\text{Cd}(\text{HCOO})_3]$  sample to 200°C. Literature source for  $\text{Cd}(\text{HCOO})_3 \cdot 2\text{H}_2\text{O}$  [10] and  $\text{Cd}(\text{HCOO})_2$  [11].



## REFERENCES

---

- [1] S. Sasaki, Y. Takeuchi, K. Fujino, X-Ray Determination of Electron-Density Distributions in Oxides, MgO, MnO, CoO, and NiO, and Atomic Scattering Factors of their Constituent Atoms, *Proc. Japan Acad. Ser. B Phys. Biol. Sci.* 55 (1979) 43–48. <https://doi.org/10.2183/pjab.55.43>.
- [2] K. Kihara, G. Donnay, Anharmonic thermal vibrations in ZnO, *Can. Mineral.* 23 (1985) 647–654. <https://pubs.geoscienceworld.org/canmin/article-abstract/23/4/647/11836/Anharmonic-thermal-vibrations-in-ZnO?redirectedFrom=fulltext>.
- [3] E.A. Owen, E.L. Yates, LXVI. X-ray measurement of the thermal expansion of pure nickel, London, Edinburgh, Dublin *Philos. Mag. J. Sci.* 21 (1936) 809–819. <https://doi.org/10.1080/14786443608561628>.
- [4] O.J. Rutt, G.R. Williams, S.J. Clarke, Reversible lithium insertion and copper extrusion in layered oxysulfides, *Chem. Commun.* (2006) 2869–2871. <https://doi.org/10.1039/b605105g>.
- [5] R.W.G. Wyckoff, Cubic closest packed, ccp, *Struct. Cryst. Struct.* 1 (1963) 33.
- [6] M. Viertelhaus, C.E. Anson, A.K. Powell, Solvothermal synthesis and crystal structure of one-dimensional chains of anhydrous zinc and magnesium formate, *Zeitschrift Fur Anorg. Und Allg. Chemie.* 631 (2005) 2365–2370. <https://doi.org/10.1002/zaac.200500202>.
- [7] M. Viertelhaus, H. Henke, C.E. Anson, A.K. Powell, Solvothermal synthesis and structure of anhydrous manganese(II) formate, and its topotactic dehydration from manganese(II) formate dihydrate, *Eur. J. Inorg. Chem.* 2003 (2003) 2283–2289. <https://doi.org/10.1002/ejic.200200699>.
- [8] W.H. Zachariasen, Untersuchungen über die Kristallstruktur von Sesquioxyden und Verbindungen ABO<sub>3</sub>, in: *Skr. Utg. Av Det Nor. Videnskaps-Akademi i Oslo* 1 Mat. Naturvidenskapelig Klasse, i kommisjon HJ Dybwad, 1928.
- [9] H.P. Walmsley, The structure of the smoke particles from a cadmium arc, *Proc. Phys. Soc.* 40 (1927) 7.
- [10] M.L. Post, J. Trotter, Cadmium(II) formate dihydrate, *Acta Crystallogr. Sect. B.* 30 (1974) 1880–1882. <https://doi.org/10.1107/S056774087400598X>.
- [11] G. Weber, The structure of anhydrous cadmium formate, *Acta Crystallogr. Sect. B Struct. Crystallogr. Cryst. Chem.* 36 (1980) 1947–1949. <https://doi.org/10.1107/s0567740880007595>.
